# Supplementary material for: A silicon-doped iridium electrode prepared by magnetron-sputtering as an advanced electrocatalyst for overall water splitting in acidic media
Source: Royal Society of Chemistry journal article supplement (doi:10.1039/c9se00250b), 2019-01-01
Supplement: c9se00250b1.pdf [file c9se00250b1.pdf]

## Supporting information

### **Silicon-doped Iridium electrode prepared by magnetron-sputtering toward advanced electrocatalyst for overall water splitting in acidic media**

Zhandong Ren\*, Lingzhi Jin, Li Deng, Ruoxi Ming, Ailian Zhang, Xiaorong Zhou, Bo Chai  
and Yuchan Zhu\*

School of Chemical and Environmental Engineering, Wuhan Polytechnic University,  
Wuhan, 430023, P. R. China.

E-mail: renzhandong@163.com, zhuyuchan@163.com

Table S1† Preparation, composition analysis and loading capacity of Si-doped Ir electrodes with different proportions

| Electrode      | Ir : Si Sputtering power (W) | Ir : Si by ED-XRF (mol%:mol%) | Ir : Si by XPS (mol%:mol%) | Loading capacity (mg <sub>Ir</sub> cm <sup>-2</sup> ) |
|----------------|------------------------------|-------------------------------|----------------------------|-------------------------------------------------------|
| Si-3-doped Ir  | 50:40                        | 96.71:3.29                    | 70.30:29.70                | 0.120                                                 |
| Si-5-doped Ir  | 40:40                        | 95.83:4.17                    | 72.03:27.97                | 0.100                                                 |
| Si-10-doped Ir | 30:40                        | 91.04:8.96                    | 62.80:37.20                | 0.075                                                 |
| Si-20-doped Ir | 20:40                        | 81.07:18.93                   | 48.76:51.24                | 0.050                                                 |
| Si-30-doped Ir | 10:40                        | 69.35:30.65                   | 38.00:62.00                | 0.025                                                 |
| Si-50-doped Ir | 5:40                         | 47.19:52.81                   | 25.62:74.38                | 0.012                                                 |

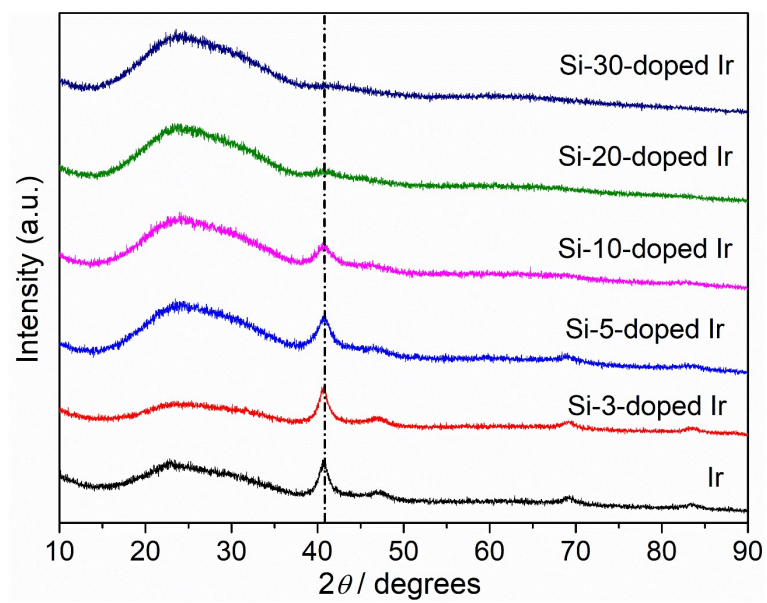

Fig. S1† X-ray diffraction curves of Si-doped Ir electrodes with different mole ratios.

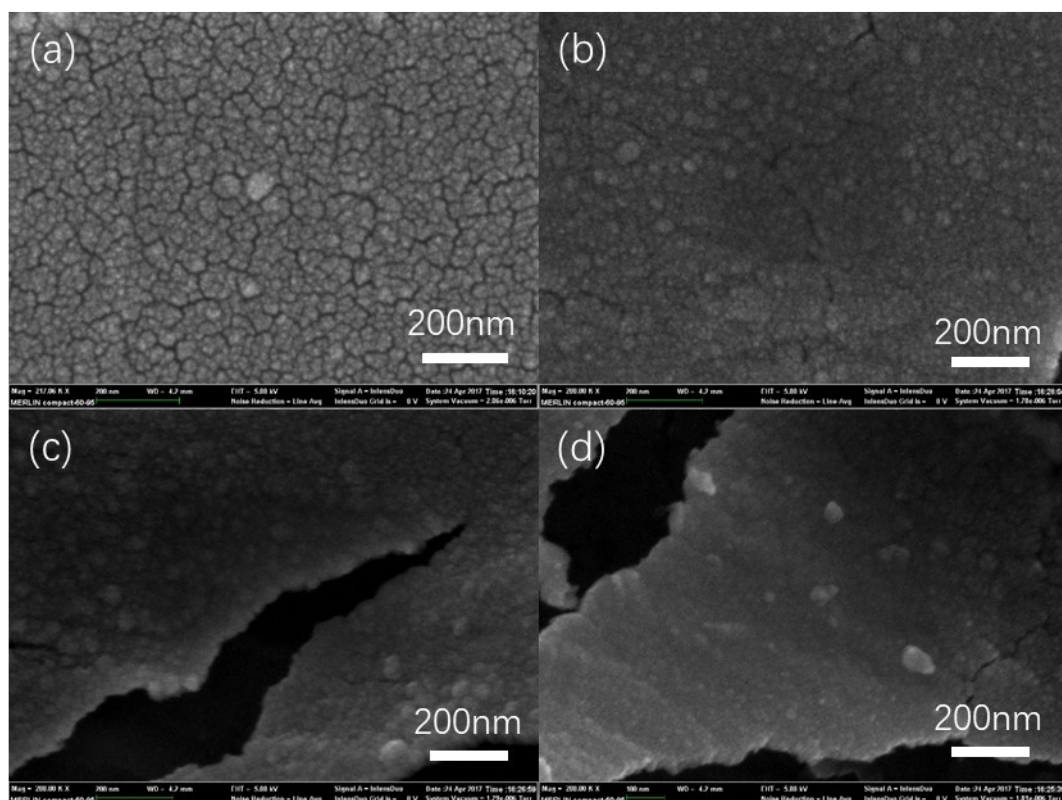

Fig. S2<sup>†</sup> SEM images of Ir (a, c) and Si-10-doped Ir (b, d) electrodes.

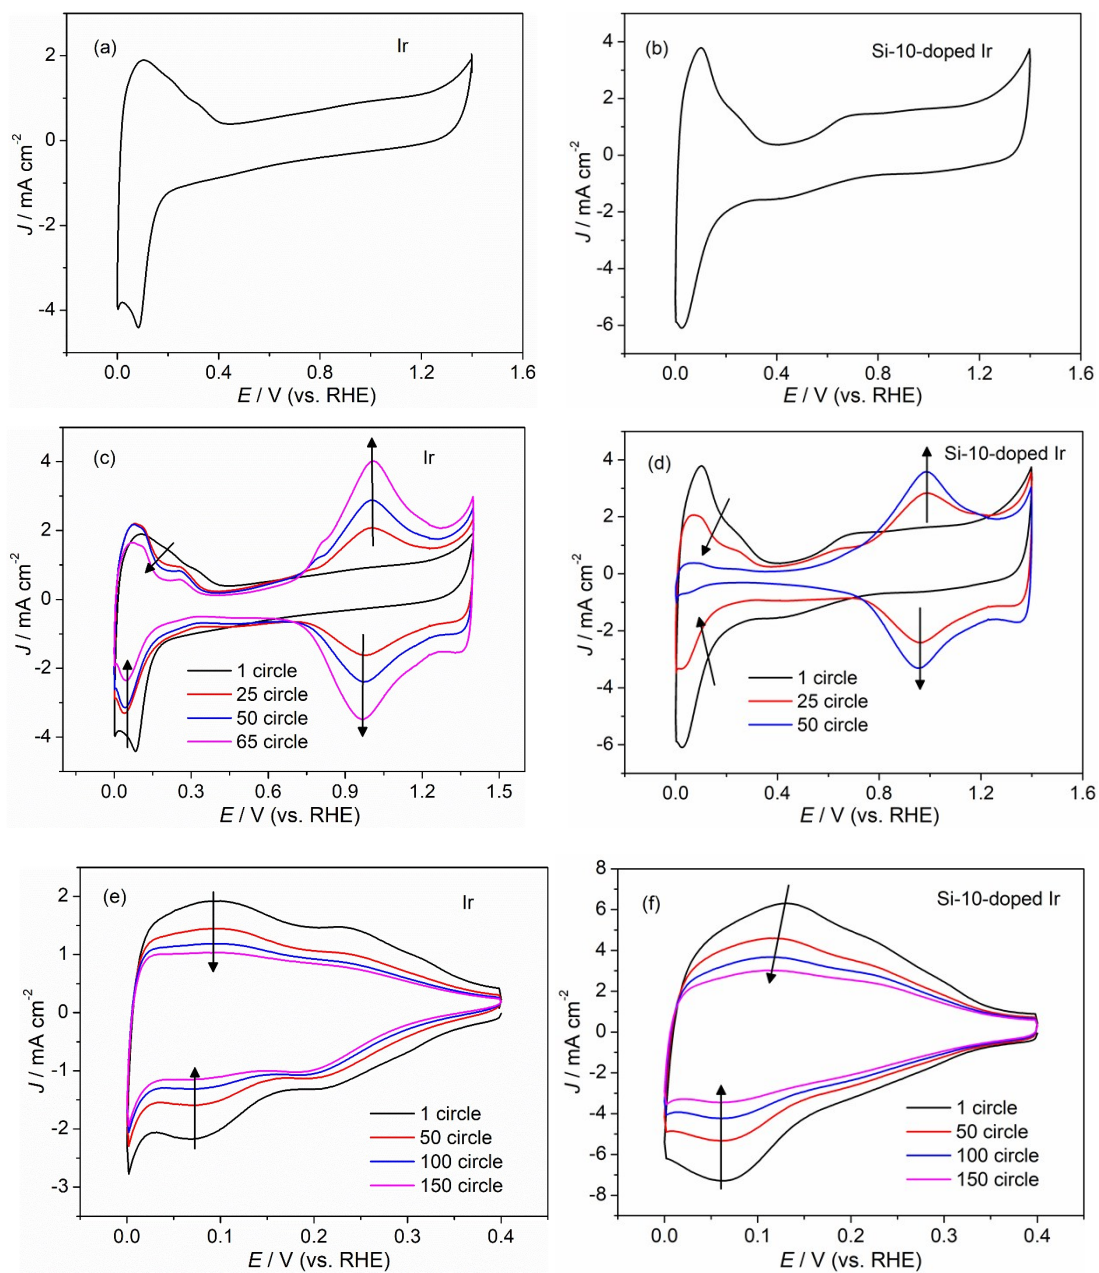

Fig. S3† Cyclic voltammograms (CVs) for Ir (a, c, e) and Si-10-doped Ir electrodes (b, d,

f)

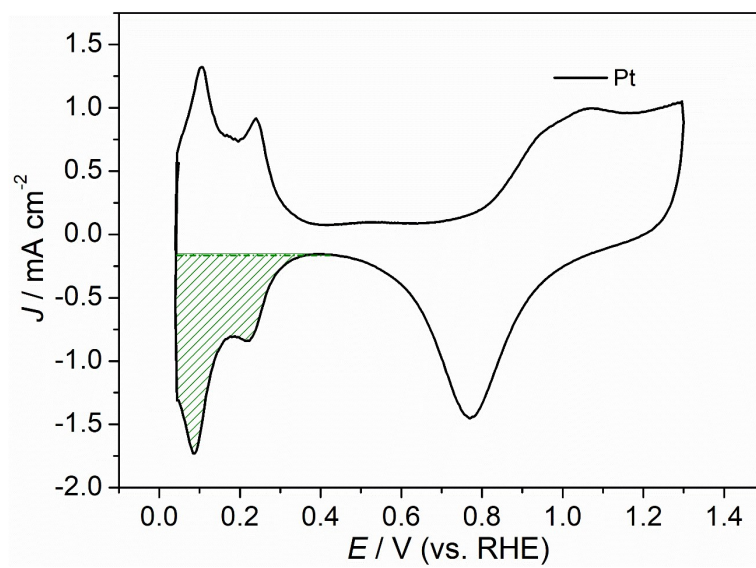

Fig. S4<sup>†</sup> Cyclic voltammogram for Pt electrode.

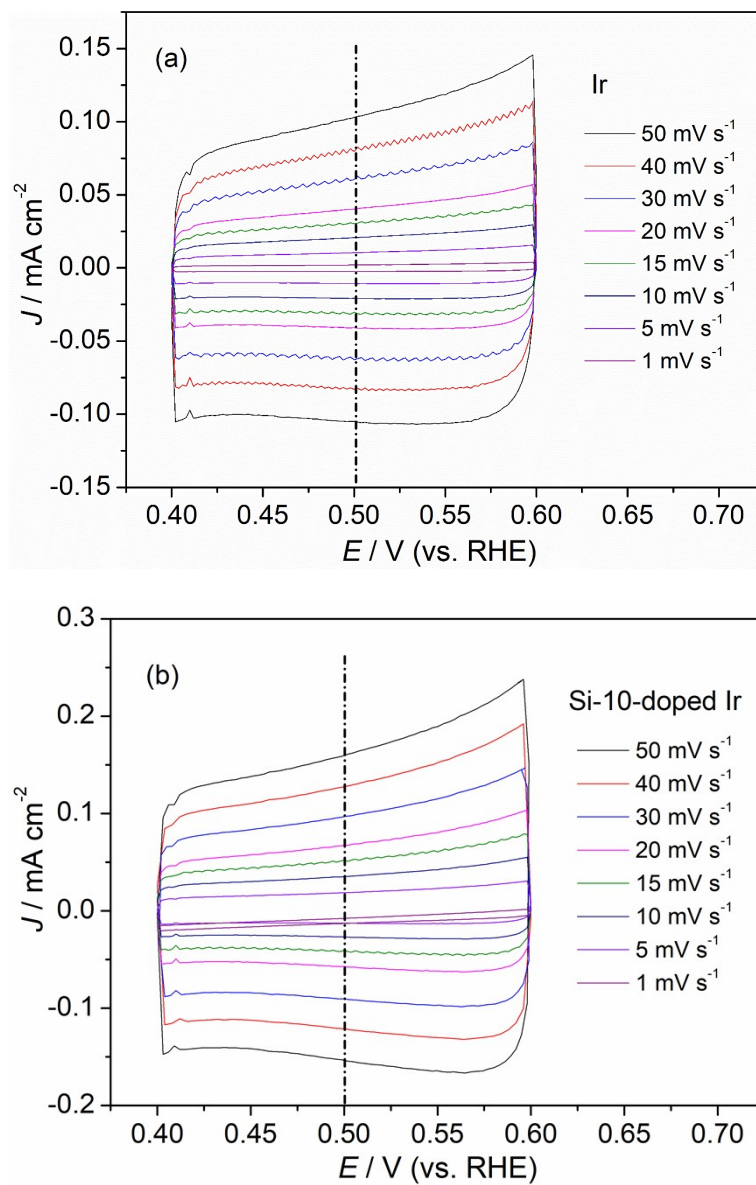

Fig. S5† CVs scanning with different scanning speeds at 1 - 50  $\text{mV s}^{-1}$  for Ir (a) and Si-10-doped Ir (b) electrodes.

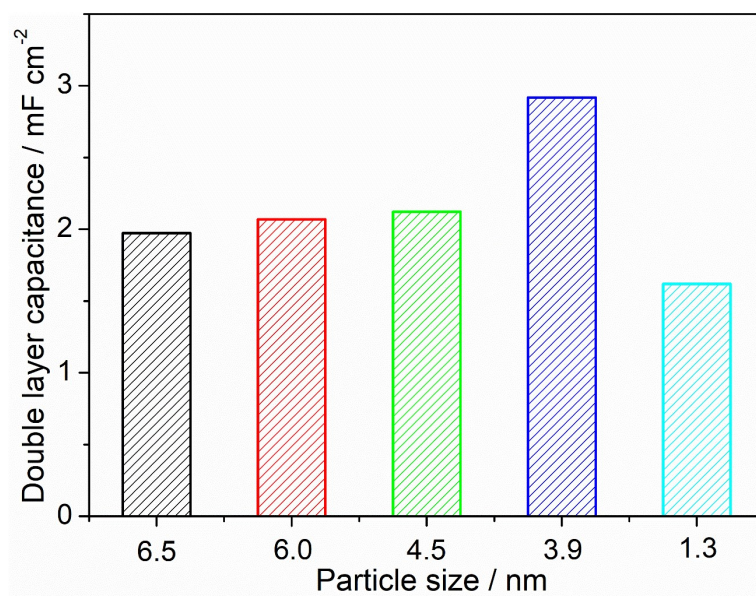

Fig. S6† Relationship between particle size and double layer capacitance.



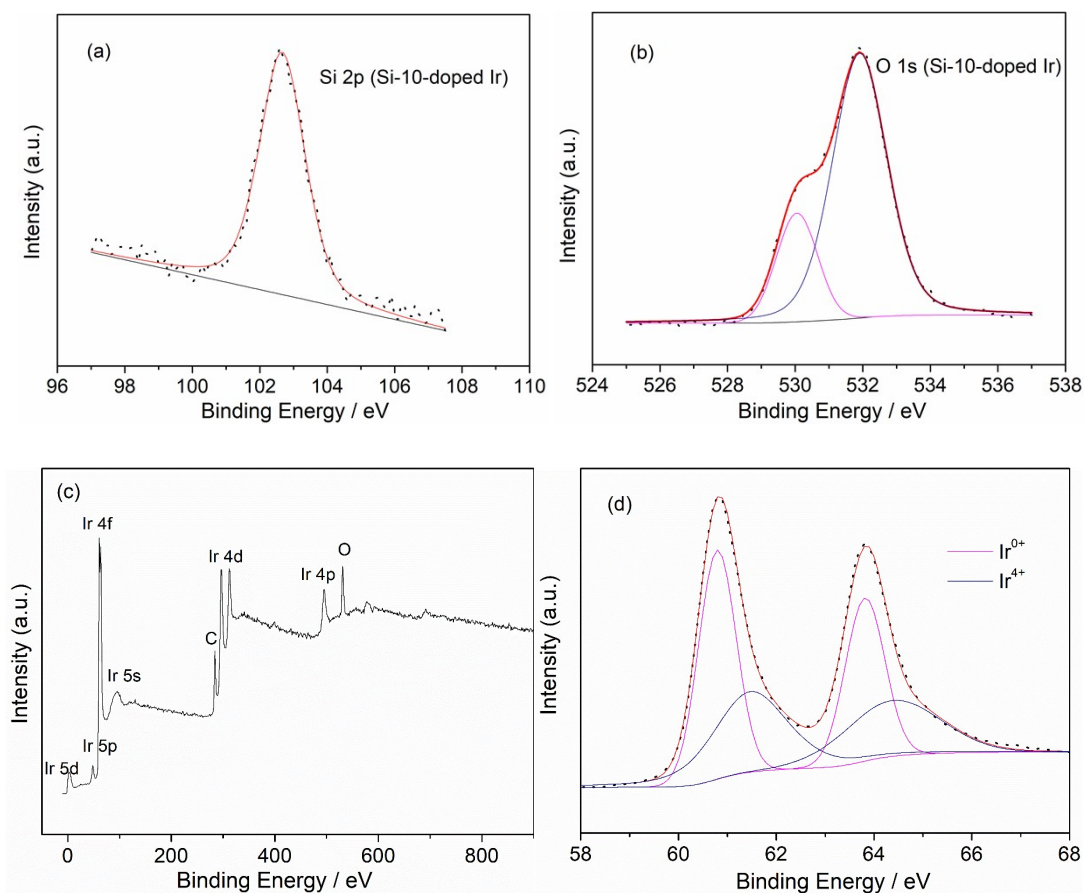

Fig. S7† XPS analysis of high-resolution spectrum of Si (a) and O (b) for Si-10-doped Ir electrodes. XPS analysis of Ir electrode for wide-range spectrum (c) and high-resolution spectrum (d).

Table S2† The Si 2p binding energy of Si-doped Ir electrodes with different proportions

| Electrode        | Binding energy of Si 2p (eV) | Negative shift of binding energy relative to that of Si <sup>4+</sup> (eV) |
|------------------|------------------------------|----------------------------------------------------------------------------|
| Si-3-doped Ir    | 102.5                        | 0.5                                                                        |
| Si-5-doped Ir    | 102.7                        | 0.3                                                                        |
| Si-10-doped Ir   | 102.6                        | 0.4                                                                        |
| Si-20-doped Ir   | 102.6                        | 0.4                                                                        |
| Si-30-doped Ir   | 102.7                        | 0.3                                                                        |
| Si-50-doped Ir   | 103.0                        | 0                                                                          |
| Si <sup>4+</sup> | 103.0                        | —                                                                          |

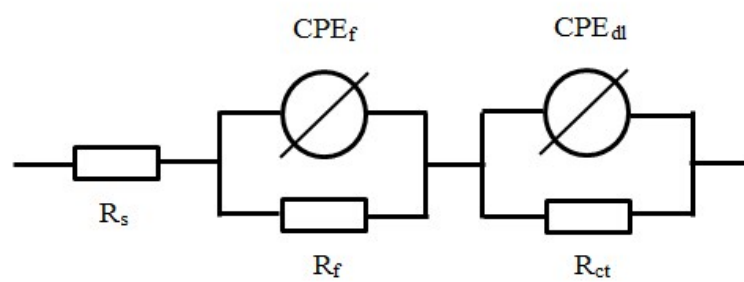

Fig. S8† The equivalent circuit of the impedance of Si-10-doped Ir and Ir electrodes

Table S3<sup>†</sup> Impedance parameters of Si-doped Ir and Ir electrodes obtained by fitting the experimental data to  $R_s(R_fQ_f)(R_{ct}Q_{dl})$  equivalent circuit

| Electrocatalyst | $R_s$<br>/ $\Omega\text{ cm}^2$ | $R_f$<br>/ $\Omega\text{ cm}^2$ | $C_f$<br>/ $\mu\text{F cm}^{-2}$ | $n_f$ | $R_{ct}$<br>/ $\Omega\text{ cm}^2$ | $C_{dl}$<br>/ $\mu\text{F cm}^{-2}$ | $n_{dl}$ |
|-----------------|---------------------------------|---------------------------------|----------------------------------|-------|------------------------------------|-------------------------------------|----------|
| Ir              | 0.8337                          | 0.2837                          | 3.98                             | 1.03  | 0.7702                             | 192                                 | 0.5966   |
| Si-10-doped Ir  | 0.8295                          | 0.1931                          | 3.50                             | 1.08  | 0.5709                             | 329                                 | 0.6588   |

Table S4† The content of Si-10-doped Ir after the accelerated linear potential sweeps over 1000 CV cycles and constant potential at  $\eta = 0.2\text{V}$  for 10000s

| Element | The molar content / mol% |                         |                                          |
|---------|--------------------------|-------------------------|------------------------------------------|
|         | Initial                  | After 1000<br>CV cycles | After 10000s at<br>$\eta = 0.2\text{ V}$ |
| Ir      | 91.04                    | 92.02                   | 92.16                                    |
| Si      | 8.96                     | 7.98                    | 7.84                                     |

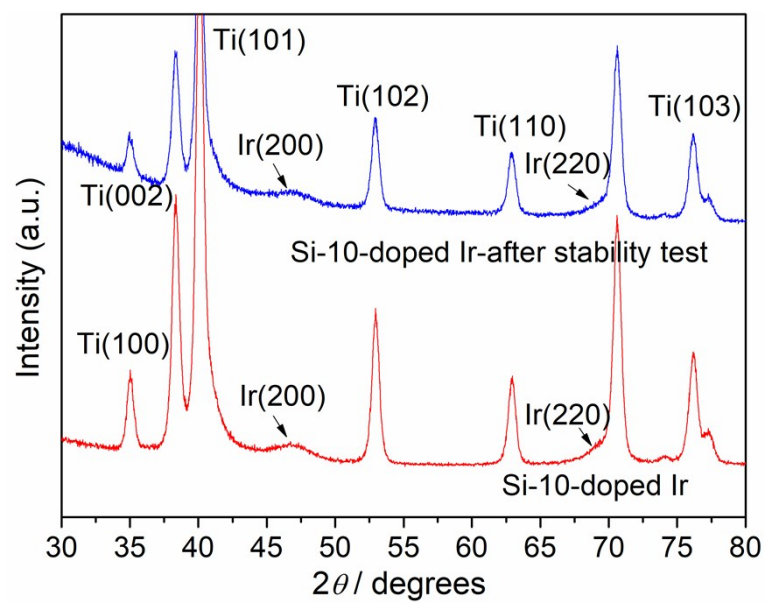

Fig. S9† X-ray diffraction curves of Si-10-doped Ir electrode before and after the long-term HER stability test at  $\eta = 0.2$  V for 10000s.
